# Supplementary material
Source: PubMed Central journal article supplement (PMC5037276)
Supplement: cmi201540x1.pdf [file cmi201540x1.pdf]

**Supplementary Table 1. Primers for qPCR. Primer sequences for endoderm, general endoderm and mesoderm genes.**

| Genes         | Sense                   | Antisense               |
|---------------|-------------------------|-------------------------|
| AFP           | AGTGAGGACAAACTATTGGCCT  | ACACCAGGGTTTACTGGAGTC   |
| ALB           | GAGACCAGAGGTTGATGTGATG  | AGTTCCGGGGCATAAAAAGTAAG |
| ANGPTL1       | AGAAAGGAAAGCCGTAACATGAA | TCCCTGTATCTTGTGGCCATCT  |
| ANGPTL2       | GAACCGAGTGATAAGCAGGA    | GTGACCCGCGAGTTCATGTT    |
| ANGPTL3       | CATCTAGTTGCGATTACTGGCA  | CCTCCTGAATAACCCTCTGGA   |
| ANGPTL4       | GGCTCAGTGGACTTCAACCG    | CCGTGATGCTATGCACCTTCT   |
| ANGPTL5       | AAAATGCAATGCCTTTTAGCACA | GGTCTTGTATGGAGGTGACTG   |
| ANGPTL6       | CCGTCACGTAGTGTCAGTATGG  | GCTGCCAGGTAGTGAAGAAGTT  |
| CD73          | AAGGACTGATCGAGCCACTC    | GGAAGTGTATCCAACGATTCCCA |
| CEBPB         | CTTCAGCCCGTACTGGAG      | GGAGAGGAAGTCGTGGTGC     |
| CK7           | TCCGCGAGGTCACCATTAAC    | GCTCTGTCAACTCCGTCTCAT   |
| CK19          | ACCAAGTTTGAGACGGAACAG   | CCCTCAGCGTACTGATTCCT    |
| CXCL12        | ATTCTCAACTCCAAACTGTGC   | ACTTTAGCTTCGGGTCAATGC   |
| DLK1          | AGGGTCCCCTTTGTGACCA     | GCAGGCCCGAACATCTCTATC   |
| EGR1          | ACCCCTCTGTCTACTATTAAGGC | TGGGACTGGTAGCTGGTATTG   |
| GATA4         | GTGTCCCAGACGTTCTCAGTC   | GGGAGACGCATAGCCTTGT     |
| IGF2          | GTGGCATCGTTGAGGAGTG     | CACGTCCCTCTCGGACTTG     |
| IRF1          | ATGCCCATCACTCGGATGC     | CCCTGCTTTGTATCGGCCTG    |
| Laminin       | CCCACTCGTCTTCTCTCTC     | AGTTTCCGAAGTACCTAGCC    |
| LZM           | GGCCAAATGGGAGAGTGGTTA   | CCAGTAGCGGCTATTGATCTGAA |
| MNDA          | AACTGACATCGGAAGCAAGAG   | CCTGATTCGGAGTAAACGAAGTG |
| MPO           | TTCTACAATGACTCAGTGGACC  | CATGAAGGGTTGGATGAGGGT   |
| PU.1          | GTGCCCTATGACACGGATCTA   | AGTCCCAGTAATGGTCGCTAT   |
| SCF           | AATCCTCTCGTCAAACCTGAAGG | CCATCTCGCTTATCCAACAATGA |
| SOX7          | CCTTACTACCGGAGTTCACA    | GAAACCCCTGGGGATTGGC     |
| VE – Cadherin | G TTCACGCATCGGTTGTTCAA  | CGCTTCCACCACGATCTCATA   |

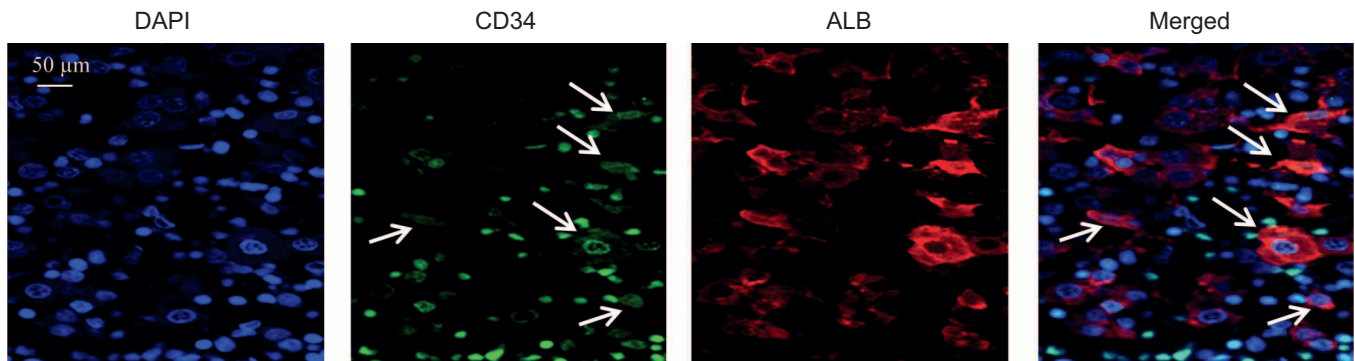

**Supplementary Figure 1.** Distribution of CD34<sup>+</sup>ALB<sup>+</sup> and CD34<sup>+</sup>ALB<sup>-</sup> cells in human fetal liver. Human fetal Liver paraffin sections were prepared and stained with antibodies specific for human CD34 and ALB. Blue: DAPI. Green: CD34. Red: Albumin (ALB) and an image with DAPI, CD34 and ALB merged. Shown are representative images from two different experiments. Scale bar applies to all panels.
